# Supplementary material for: A flexible insulator of a hollow SiO2 sphere and polyimide hybrid for flexible OLEDs
Source: Royal Society of Chemistry journal article supplement (doi:10.1039/c4cp04266b), 2014-11-27
Supplement: c4cp04266b1.pdf [file c4cp04266b1.pdf]

## *Supporting information*

### **Flexible insulator of hollow SiO<sub>2</sub> spheres and polyimide hybrid for flexible OLED**

**Min Kyu Kim,<sup>a</sup> Dong Won Kim,<sup>b</sup> Dong Wook Shin,<sup>a</sup> Sang Joon Seo,<sup>a</sup> Ho Kyoon Chung<sup>a</sup> and Ji Beom Yoo<sup>\*a,b</sup>**

<sup>a</sup> SKKU Advanced Institute of Nanotechnology (SAINT), Sungkyunkwan University, Suwon 440-746, South Korea

<sup>b</sup> School of Advanced Materials Science & Engineering, Sungkyunkwan University, Suwon 440-746, South Korea

Corresponding Author

\* Prof. J. Yoo, [jbyoo@skku.edu](mailto:jbyoo@skku.edu)

Figure S1 Shows the effect of variation of the hollow SiO<sub>2</sub> spheres and PI ratio was observed by changing PS beads solution concentration and O<sub>2</sub> RIE treatment. In the experiment, PS beads solutions with 0.21, 0.6, 0.75 and 0.75wt% (O<sub>2</sub> RIE treated substrate) were spin coated at 2000rpm and volume fraction of each samples are 0.13, 0.23, 0.32 and 0.42 respectively.

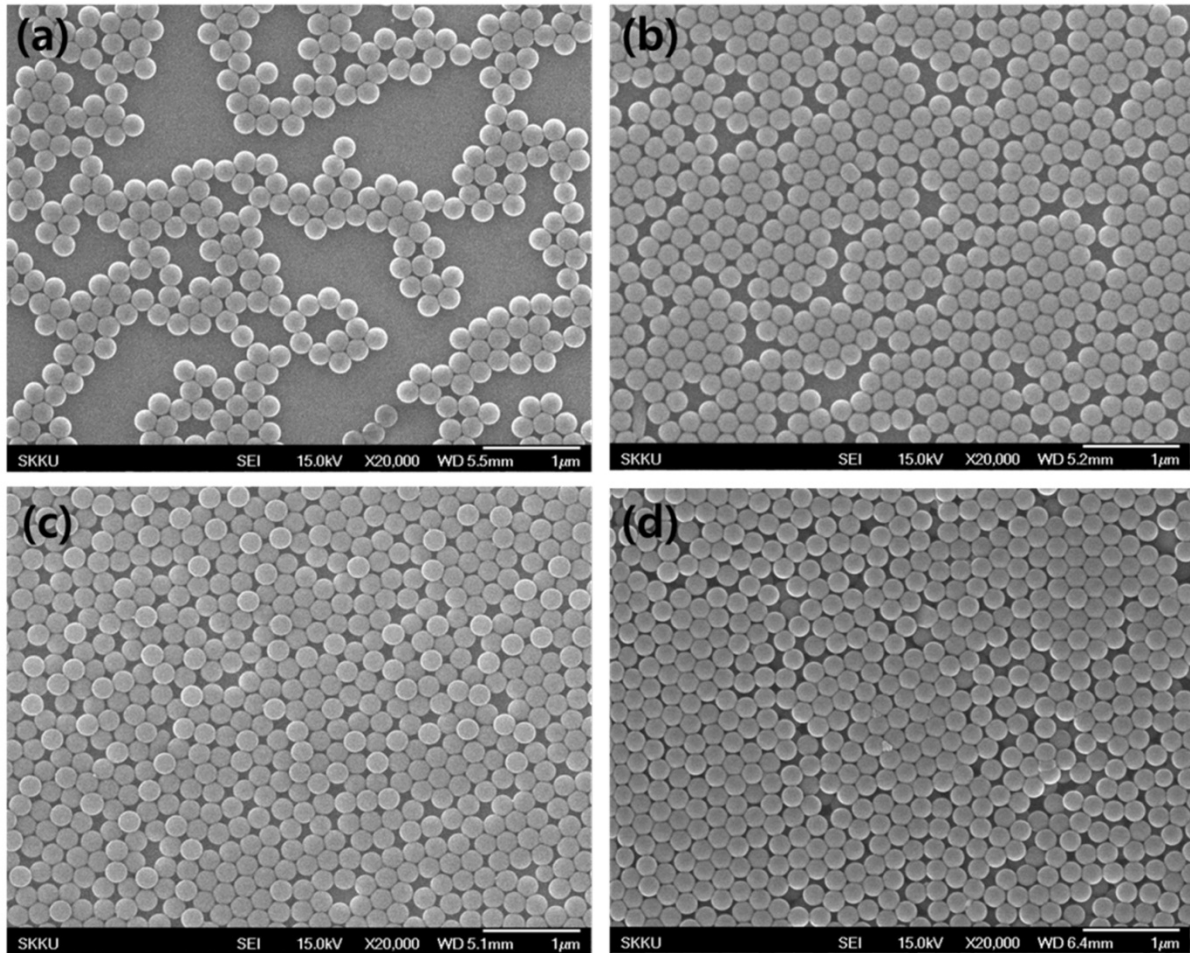

**Figure S1.** (a) SEM image of PS beads with 0.21wt% PS solution. (b) SEM image of PS beads with 0.6wt% PS solution. (c) SEM image of PS beads with 0.75wt% PS solution. (d) SEM image of PS beads with 0.75wt% PS solution on O<sub>2</sub> RIE treated substrate.

Figure S2 shows relation between the volume fraction of hollow SiO<sub>2</sub> spheres and dielectric constant of hybrid film. The volume fractions of hollow SiO<sub>2</sub> spheres are 0.13, 0.23 and 0.32 have the values of dielectric constant which are 3.18, 2.68 and 1.98 respectively. The hollow SiO<sub>2</sub> spheres and polyimide hybrid film having 0.42 volume fraction was collapsed by tiny external force. PS beads stacked 2 layers after spin coating on O<sub>2</sub> RIE treated substrate and SiO<sub>2</sub> cannot cover bottom of PS beads during ALD process.

Kim et. al.

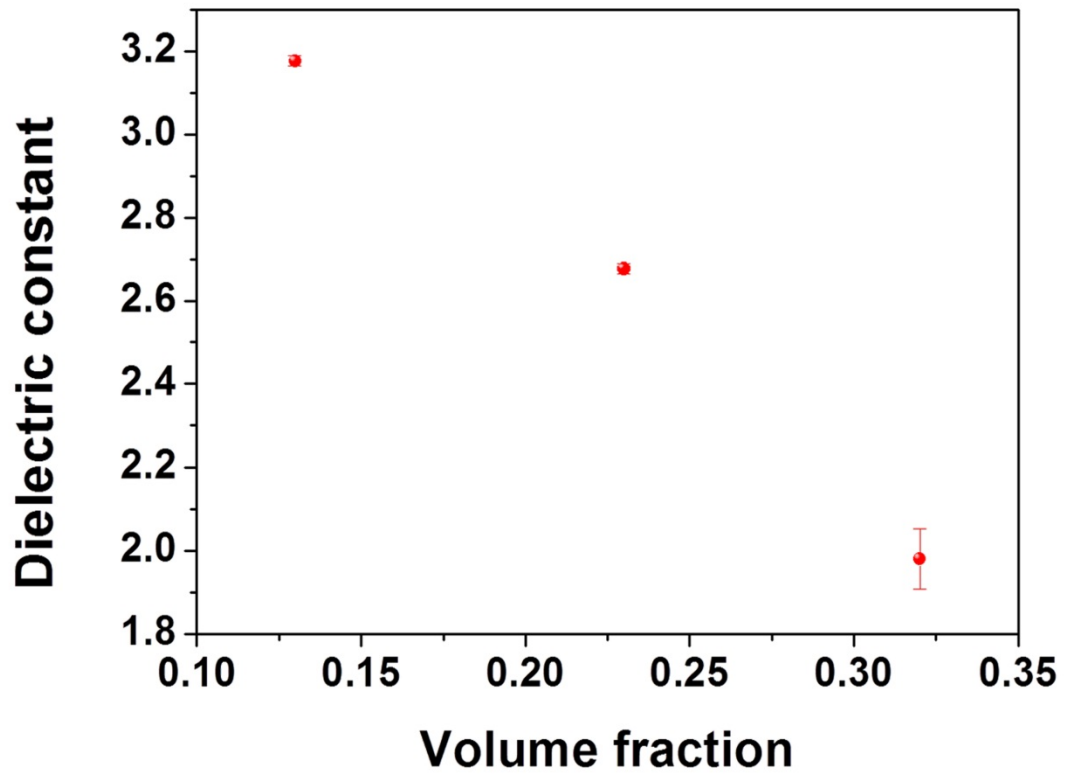

Figure S2. The volume fraction of hollow SiO<sub>2</sub> spheres versus dielectric constant of hybrid film.
